# Supplementary material for: Estimating the effect of sulfonylurea on HbA1c in diabetes: a systematic review and meta-analysis
Source: Springer Nature journal article supplement (doi:10.1007/s00125-013-2856-6), 2013-03-14

Electronic supplementary material - ESM Fig. 1

(i) - Funnel plot showing risk of publication bias in oral therapy trials with Egger's test for likely risk of bias

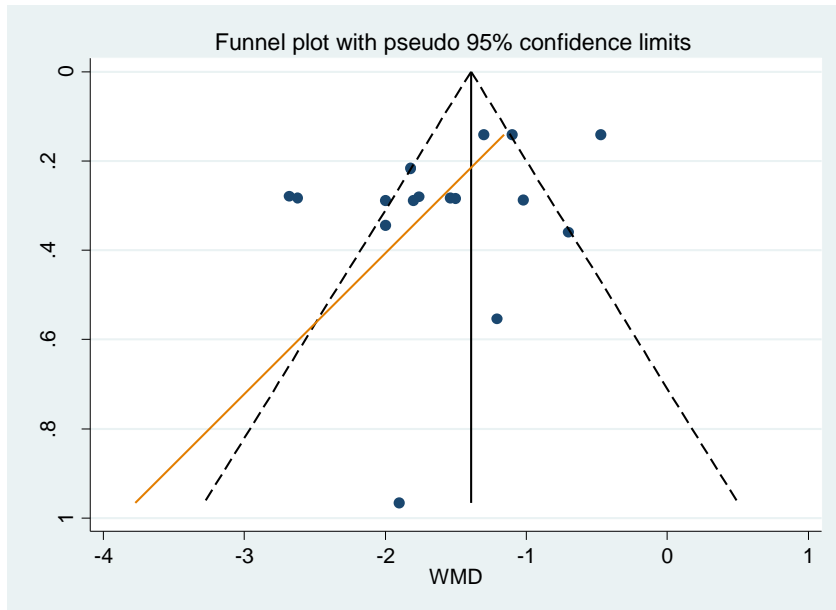

(ii) - Funnel plot showing risk of publication bias in insulin trials with Egger's test for likely risk of bias

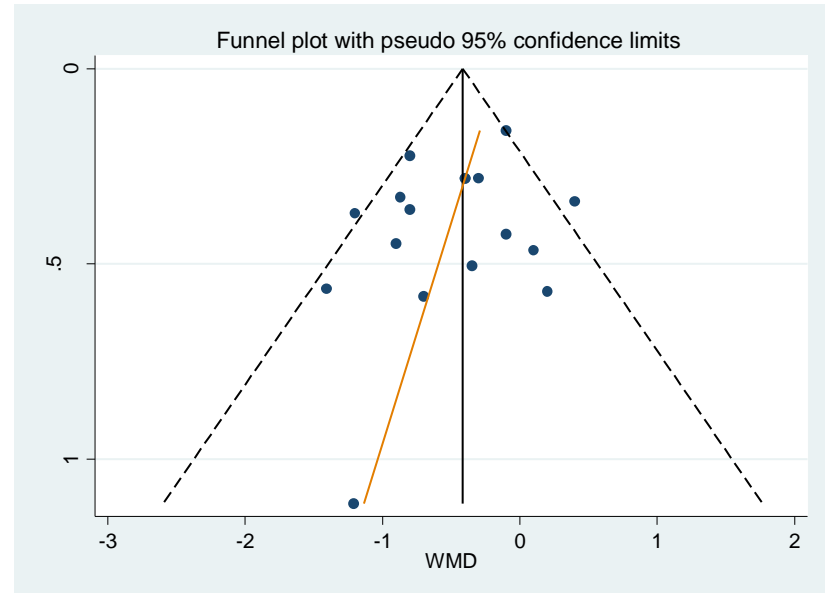

Supplement: MOESM1 [file 8091464]
