# Supplementary material for: Estimating the effect of sulfonylurea on HbA1c in diabetes: a systematic review and meta-analysis
Source: Springer Nature journal article supplement (doi:10.1007/s00125-013-2856-6), 2013-03-14
Supplement: MOESM3 [file 8091464]

**Electronic supplementary material – ESM Table 1 - Sensitivity analyses**

| Sensitivity analysis                                           | Monotherapy trials |                          | Oral combination trials |                          | Combination with insulin trials |                          |
|----------------------------------------------------------------|--------------------|--------------------------|-------------------------|--------------------------|---------------------------------|--------------------------|
|                                                                | n                  | Mean difference (95% CI) | n                       | Mean difference (95% CI) | n                               | Mean difference (95% CI) |
| Full dataset                                                   | 8                  | -1.51 (-1.78, -1.25)     | 4                       | -1.62 (-2.24, -1.00)     | 17                              | -0.46 (-0.69, -0.24)     |
| Restricted to trials of 100 or more participants               | 4                  | -1.61 (-1.92, -1.31)     | 4                       | -1.62 (-2.24, -1.00)     | 1                               | -0.1 (-0.41, 0.21)       |
| Restricted to trials which reported method of randomisation    | 0                  | Not possible             | 0                       | Not possible             | 5                               | -0.46 (-0.97, 0.05)      |
| Excluding trials in which estimations or imputations were made | 7                  | -1.51 (-1.83, -1.19)     | 3                       | -1.86 (-2.45, -1.26)     | 13                              | -0.53 (-0.77, -0.29)     |
| Including unblinded trials                                     | 9                  | -1.46 (-1.73, -1.19)     | 4                       | -1.62 (-2.24, -1.00)     | 29                              | -0.29 (-0.52, -0.07)     |
|                                                                |                    |                          |                         |                          |                                 |                          |
