# Supplementary material for: Estimating the effect of sulfonylurea on HbA1c in diabetes: a systematic review and meta-analysis
Source: Springer Nature journal article supplement (doi:10.1007/s00125-013-2856-6), 2013-03-14
Supplement: MOESM4 [file 8091464]

## Electronic supplementary material – ESM Text - Medline search terms

1. sulphonylurea.mp.
2. sulfonylurea.mp.
3. Diabetes Mellitus, Type 1/ or Diabetes Mellitus, Type 2/ or Diabetes Mellitus/
4. diabetes.mp.
5. acetohexamide.mp.
6. Chlorpropamide.mp.
7. Tolbutamide.mp.
8. Tolazamide.mp.
9. Glipizide.mp.
10. Gliclazide.mp.
11. Glibenclamide.mp.
12. glyburide.mp.
13. Gliquidone.mp.
14. Glyclopamide.mp.
15. Glimepiride.mp.
16. glucotrol xl.mp.
17. 1 or 2 or 5 or 6 or 7 or 8 or 9 or 10 or 11 or 12 or 13 or 14 or 15 or 16
18. glucotrol.mp.
19. 17 or 18
20. glycated haemoglobin.mp.
21. HbA1c.mp.
22. glycosylated haemoglobin.mp.
23. glycaemic control.mp.
24. glycemic control.mp.
25. 20 or 21 or 22 or 23 or 24
26. 3 or 4
27. 19 and 25 and 26
28. glycated hemoglobin.mp.
29. glycosylated hemoglobin.mp.
30. 25 or 28 or 29
31. T1DM.mp.
32. T2DM.mp.
33. NIDDM.mp.
34. IDDM.mp.
35. 26 or 31 or 32 or 33 or 34
36. randomized controlled trial.pt.
37. controlled clinical trial.pt.
38. randomized.ab.
39. placebo.ab.
40. drug therapy.fs.
41. randomly.ab.
42. trial.ab.

43. groups.ab.

44. 36 or 37 or 38 or 39 or 40 or 41 or 42 or 43

45. exp animals/ not humans.sh.

46. ((randomized controlled trial or controlled clinical trial or randomized or placebo or drug therapy or randomly or trial or groups) not (animals not humans)).sh.

47. 19 and 30 and 35 and 46
